# Supplementary material
Source: PubMed Central journal article supplement (PMC3418712)
Supplement: supp_blood-2012-02-412197_blood-2012-02-412197-1.pdf [file supp_blood-2012-02-412197_blood-2012-02-412197-1.pdf]

## **Online Supplemental Material**

### **Supplemental Materials and Methods**

#### **Western blot analysis for histone H3**

Plasma was analyzed by Western blotting for histone H3. Plasma was mixed with Laemmli-Buffer supplemented with 5% beta-mercaptoethanol (Biorad). After 3 min at 95°C, samples were subjected to 15% (w/v) SDS-polyacrylamide gel electrophoresis, followed by immunoblotting procedure with a polyclonal rabbit anti-histone H3 (Abcam, product number ab1791) as primary antibody and goat-anti-rabbit-IgG conjugated to horseradish peroxidase (Biorad) as secondary antibody. Detection was carried out with a Pierce ECL Western Blotting Substrate (Thermo Scientific). Human recombinant histone H3 (New England Biolabs) served as a positive control.

#### **Isolation and visualization of plasma DNA**

DNA was isolated from plasma using a DNA isolation kit according to manufacturer's instructions (Omega bio-tek, Norcross, GA), subjected to 2% agarose gel electrophoresis in the presence of ethidium bromide and visualized using a gel documentation system (BioRad, Hercules, CA).

## **Legends to Supplemental Figures and Tables**

**Supplemental Table 1. Learning cohort. Summary of demographic and diagnostic data from TMA patients and healthy controls.** The learning cohort included plasma from 10 healthy controls (Ctrl), 4 patients with D+HUS, 8 patients with tumor-associated TMA, 11 patients with TMA of unknown etiology and 6 patients with acute acquired TTP before PEX therapy. From 5 of these TTP patients samples were available from the time when they were in remission. The table displays sample number, diagnosis, gender (Male/Female), age at first plasma sampling (years), ADAMTS13 activity (%) measured by FRETs-VWF73 assay, ADAMTS13 inhibitor (Bethesda units/ml), plasma DNA (ng/ml), plasma nucleosomes (fold increase over control), plasma LDH activity (OD/min), plasma myeloperoxidase (fold increase over control), plasma S100A8/A9 (fold increase over control), plasma histone H3 (number of bands detected by Western blot). The data are also displayed in figure 1 and supplemental Fig. 1.

**Supplemental Figure 1. Circulating Histones and DNA are fragmented in patients with acute TMA.** (A) Immunoblot of histone H3. Recombinant histone H3 was used as a positive control (H3). Histone H3 of approximately 16kDa as well as 2 fragments of histone H3 were detected in 17 of 29 patients. The number of histone H3 bands detected in each patient is listed in Supplemental Table 1. TMA patient samples #31 (left), #35 (middle) and #17 (right) are shown as examples. All controls investigated (n = 10) were negative for Histone H3. (B) Gel electrophoresis of plasma DNA isolated from 4 patients with acute acquired TTP, D+HUS (HUS), tumor associated TMA (Tumor), a TMA of unknown etiology (not otherwise specified [NOS]) and from a healthy control (Ctrl). Patients, but not the control showed a single band of approximately 180 bp.

**Supplemental Figure 2. Correlation of plasma markers of patients with acute TMAs.** Values for DNA (ng/ml), nucleosomes (fold increase over healthy controls), LDH activity (OD<sub>490</sub>/min), MPO (fold increase over healthy controls), S100A8/A9 (fold increase over healthy controls), ADAMTS13 activity (%) from patients with acute TMA (n = 29, see Supplemental Table 1) were correlated to each other using Spearman correlation. The table shows Spearman r and Bonferroni-adjusted significance levels. Results were considered significant at  $p < 0.005$ .

**Supplemental Table 2. Investigational cohort. Summary of demographic and diagnostic data from acquired TTP patients during therapy.** TTP patients were treated as indicated in table 1. Plasma samples were collected at admission, before PEX or as indicated in “Sample Description”. The table displays sample number, patient ID, gender (Male/Female), age at first plasma sampling (years), diagnosis, treatment, days after first admission to hospital, ADAMTS13 activity (%) detected by FRETs-VWF73 or immunoblotting (IB), ADAMTS13 inhibitor (Bethesda units/ml), platelet count (1000/ $\mu$ l), DNA (ng/ml), plasma MPO (fold increase over controls). The data are also displayed in figures 2, 3 and 4.

| Sample # | Diagnosis | Acute / Remission | Sex | Age  | ADAMTS13 activity (% of Ctrl) | ADAMTS13 inhibitor (BU/ml) | DNA (ng/ml) | Nucleosomes (fold increase) | LDH Activity (OD/min) | Myeloperoxidase (fold increase) | S100A8/A9 (fold increase) | # of H3 Bands [WB] |
|----------|-----------|-------------------|-----|------|-------------------------------|----------------------------|-------------|-----------------------------|-----------------------|---------------------------------|---------------------------|--------------------|
| 1        | Ctrl      |                   | M   | 59   | >100%                         |                            | 8           | 0.5                         | 0.020                 | 2.4                             | 0.7                       | 0                  |
| 2        | Ctrl      |                   | F   | 52   | >100%                         |                            | 26          | 3.7                         | 0.016                 | 1.2                             | 0.5                       | 0                  |
| 3        | Ctrl      |                   | F   | 31   | >100%                         |                            | 43          | 0.5                         | 0.003                 | 0.1                             | 0.5                       | 0                  |
| 4        | Ctrl      |                   | M   | 39   | >100%                         |                            | 46          | 0.5                         | 0.030                 | 1.6                             | 2.2                       | 0                  |
| 5        | Ctrl      |                   | M   | 42   | >100%                         |                            | 13          | 0.2                         | 0.007                 | 0.4                             | 1.7                       | 0                  |
| 6        | Ctrl      |                   | F   | 43   | >100%                         |                            | 29          | 1.9                         | 0.020                 | 2.2                             | 1.8                       | 0                  |
| 7        | Ctrl      |                   | M   | 49   | >100%                         |                            | 57          | 0.7                         | 0.011                 | 0.8                             | 1.0                       | 0                  |
| 8        | Ctrl      |                   | M   | 52   | >100%                         |                            | 45          | 1.4                         | 0.013                 | 1.0                             | 0.8                       | 0                  |
| 9        | Ctrl      |                   | F   | 32   | >100%                         |                            | 28          | 0.1                         | 0.001                 | 0.2                             | 0.4                       | 0                  |
| 10       | Ctrl      |                   | F   | 45   | >100%                         |                            | 16          | 0.4                         | 0.001                 | 0.1                             | 0.4                       | 0                  |
| n = 10   | Ctrl      |                   |     | Mean | >100%                         |                            | 31.0        | 1.0                         | 0.012                 | 1.0                             | 1.0                       | 0/10               |
| 11       | D+HUS     | Acute             | M   | 2    | 33%                           |                            | 9316        | 156.7                       | 12.635                | 575.8                           | > 100                     | 3                  |
| 12       | D+HUS     | Acute             | F   | 6    | 85%                           |                            | 2661        | 133.6                       | 13.113                | 33.2                            | > 100                     | 2                  |
| 13       | D+HUS     | Acute             | F   | 4    | 77%                           |                            | 1728        | 453.6                       | 6.339                 | 34.6                            | > 100                     | 2                  |
| 14       | D+HUS     | Acute             | M   | 5    | 45%                           |                            | 5789        | 138.2                       | 7.228                 | 127.4                           | > 100                     | 3                  |
| n = 4    | D+HUS     | Acute             |     | Mean | 60%                           |                            | 4873.4      | 220.5                       | 9.829                 | 192.8                           | > 100                     | 4/4                |
| 15       | Tumor-TMA | Acute             | F   | 47   | 45%                           |                            | 794         | 39.4                        | 11.097                | 49.6                            | > 100                     | 0                  |
| 16       | Tumor-TMA | Acute             | M   | 71   | 76%                           |                            | 1786        | 73.3                        | 1.776                 | 15.0                            | 76.3                      | 1                  |
| 17       | Tumor-TMA | Acute             | F   | 74   | 63%                           |                            | 3778        | 85.0                        | 1.256                 | 13.9                            | 9.4                       | 3 (Figure S1A)     |
| 18       | Tumor-TMA | Acute             | F   | 47   | 67%                           |                            | 934         | 31.2                        | 1.672                 | 20.7                            | 10.4                      | 2                  |
| 19       | Tumor-TMA | Acute             | M   | 29   | 32%                           |                            | 108         | 9.6                         | 0.411                 | 10.8                            | 54.2                      | 0                  |
| 20       | Tumor-TMA | Acute             | M   | 74   | 64%                           |                            | 2632        | 84.5                        | 2.688                 | 39.9                            | > 100                     | 2                  |
| 21       | Tumor-TMA | Acute             | F   | 57   | 51%                           |                            | 101         | 0.6                         | 0.191                 | 3.5                             | 0.2                       | 0                  |
| 22       | Tumor-TMA | Acute             | F   | 73   | 32%                           |                            | 468         | 124.8                       | 5.153                 | 23.4                            | > 100                     | 2                  |
| n = 8    | Tumor-TMA | Acute             |     | Mean | 54%                           |                            | 1325.4      | 56.1                        | 3.030                 | 22.1                            | -                         | 5/8                |
| 23       | NOS-TMA   | Acute             | F   | 72   | 72%                           |                            | 416         | 13.3                        | 3.389                 | 9.3                             | > 100                     | 0                  |
| 24       | NOS-TMA   | Acute             | F   | 18   | 65%                           |                            | 316         | 25.2                        | 5.251                 | 18.5                            | > 100                     | 0                  |
| 25       | NOS-TMA   | Acute             | M   | 77   | 67%                           |                            | 1215        | 50.2                        | 1.672                 | 115.3                           | > 100                     | 2                  |
| 26       | NOS-TMA   | Acute             | M   | 21   | 63%                           |                            | 1865        | 53.6                        | 5.153                 | 134.7                           | > 100                     | 2                  |
| 27       | NOS-TMA   | Acute             | M   | 26   | 71%                           |                            | 266         | 10.0                        | 0.094                 | 48.9                            | 5.4                       | 0                  |
| 28       | NOS-TMA   | Acute             | M   | 83   | 36%                           |                            | 33          | 3.8                         | 0.058                 | 10.5                            | 0.9                       | 0                  |
| 29       | NOS-TMA   | Acute             | M   | 63   | 65%                           |                            | 128         | 0.6                         | 0.031                 | 32.6                            | 1.1                       | 0                  |
| 30       | NOS-TMA   | Acute             | F   | 34   | 49%                           |                            | 46          | 4.5                         | 0.042                 | 11.1                            | 1.1                       | 0                  |
| 31       | NOS-TMA   | Acute             | M   | 26   | 61%                           |                            | 123         | 28.7                        | 3.802                 | 11.1                            | > 100                     | 1 (Figure S1A)     |
| 32       | NOS-TMA   | Acute             | F   | 50   | >100%                         |                            | 41          | 2.6                         | 0.010                 | 2.3                             | 0.8                       | 0                  |
| 33       | NOS-TMA   | Acute             | F   | 28   | 72%                           |                            | 245         | 24.1                        | 3.078                 | 4.9                             | > 100                     | 0                  |
| n = 11   | Tumor-TMA | Acute             |     | Mean | 62%                           |                            | 426.7       | 19.7                        | 2.053                 | 36.3                            | -                         | 3/11               |
| 34       | TTP #1    | Acute             | F   | 25   | <5%                           | >>2                        | 2860        | 12.9                        | 1.282                 | 30.3                            | > 100                     | 2                  |
| 35       | TTP #2    | Acute             | F   | 28   | <5%                           | 1                          | 1625        | 53.5                        | 4.345                 | 32.9                            | > 100                     | 2 (Figure S1A)     |
| 36       | TTP #3    | Acute             | M   | 57   | <5%                           | 1.7                        | 145         | 5.1                         | 0.554                 | 7.9                             | 2.5                       | 0                  |
| 37       | TTP #4    | Acute             | F   | 26   | <5%                           | >2                         | 182         | 13.7                        | 2.125                 | 17.6                            | > 100                     | 1                  |
| 38       | TTP #5    | Acute             | F   | 57   | <5%                           | 1.7                        | 908         | 57.0                        | 6.459                 | 32.5                            | > 100                     | 2                  |
| 39       | TTP #6    | Acute             | M   | 29   | <5%                           | 1.8                        | 348         | 12.5                        | 2.849                 | 13.8                            | > 100                     | 1                  |
| n = 6    | TTP       | Acute             |     | Mean | <5%                           |                            | 1011.3      | 25.8                        | 2.936                 | 22.5                            | -                         | 5/6                |
| 40       | TTP #1    | Remission         |     |      | 92%                           |                            | 28          | 1.0                         | 0.042                 | 1.7                             | 2.1                       | 0                  |
| 41       | TTP #2    | Remission         |     |      | 67%                           |                            | 36          | 2.0                         | 0.062                 | 1.8                             | 1.5                       | 0                  |
| 42       | TTP #3    | Remission         |     |      | 73%                           |                            | 34          | 0.9                         | 0.046                 | 5.2                             | 1.7                       | 0                  |
| 43       | TTP #4    | Remission         |     |      | 94%                           |                            | 14          | 0.9                         | 0.076                 | 6.6                             | 2.2                       | 0                  |
| 44       | TTP #5    | Remission         |     |      | 80%                           |                            | 59          | 1.1                         | 0.11                  | 3.6                             | 2.4                       | 0                  |
| n = 5    | TTP       | Remission         |     | Mean | 81%                           |                            | 34.0        | 1.2                         | 0.067                 | 3.8                             | 2.0                       | 0/5                |

**Supplemental Table 1**

**A**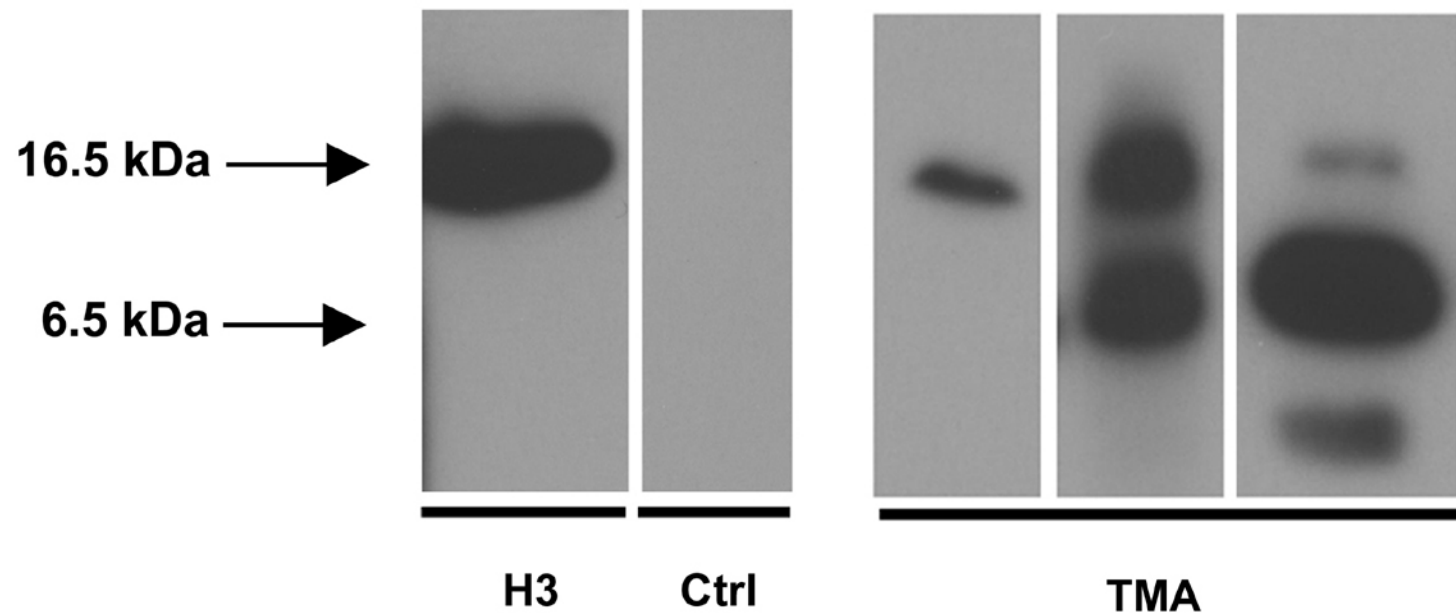**B**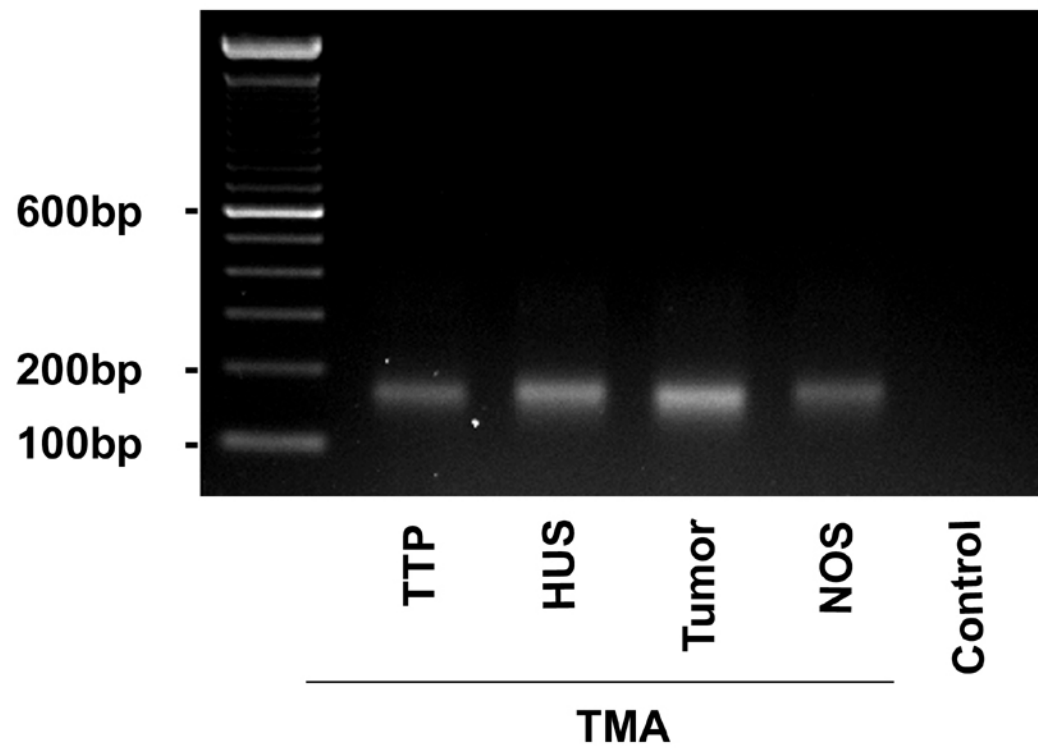**Supplemental Figure 1**

|                                   |                       |                       |                       |                 |                  |                 |
|-----------------------------------|-----------------------|-----------------------|-----------------------|-----------------|------------------|-----------------|
| <b>DNA</b>                        | -                     |                       |                       |                 |                  |                 |
| <b>Nucleosomes</b>                | 0.84<br>( $<0.0001$ ) | -                     |                       |                 |                  |                 |
| <b>LDH</b>                        | 0.61<br>(0.0004)      | 0.79<br>( $<0.0001$ ) | -                     |                 |                  |                 |
| <b>MPO</b>                        | 0.71<br>( $<0.0001$ ) | 0.64<br>(0.0002)      | 0.55<br>(0.002)       | -               |                  |                 |
| <b>S100A8/A9</b>                  | 0.58<br>(0.001)       | 0.66<br>( $<0.0001$ ) | 0.84<br>( $<0.0001$ ) | 0.52<br>(0.004) | -                |                 |
| <b>ADAMTS13</b>                   | 0.04<br>(0.85)        | 0.10<br>(0.60)        | -0.06<br>(0.76)       | -0.01<br>(0.95) | -0.15<br>(0.45)  | -               |
| <b>Spearman r<br/>(p - Value)</b> | <b>DNA</b>            | <b>Nucleosomes</b>    | <b>LDH</b>            | <b>MPO</b>      | <b>S100A8/A9</b> | <b>ADAMTS13</b> |

**Supplemental Figure 2**
